# Supplementary material for: Upregulation of Cytoglobin in 3D-cultures of Head and Neck Cancer Cells: Role of Hypoxia and Implications for Cisplatin Resistance
Source: Preprints.org preprint supplement (doi:10.20944/preprints202208.0043.v1), 2022-08-02
Supplement: Supplementary file 2 [file supplementary]

## Supplementary Materials:

### Upregulation of cytoglobin in 3D-cultures of head and neck cancer cells: Role of hypoxia and implications for cisplatin resistance

Garret Rochford<sup>1</sup>, Rameeza Basar<sup>1</sup>, Rose Dhiman<sup>1</sup>, Djeran Simitdjioglu<sup>1</sup>, Janet M Risk<sup>2</sup>, Lorna S Thorne<sup>1</sup>, Lakis Liloglou<sup>2</sup> and Nikolas J Hodges<sup>1\*</sup>

<sup>1</sup> School of Biosciences, University of Birmingham, Edgbaston, Birmingham, B15 2TT, UK, <sup>2</sup>Institute of Translational Medicine, University of Liverpool, Liverpool, L69 3BX, UK

\* Corresponding author, n.hodges@bham.ac.uk

## Supplementary Materials & Methods

### Cobalt chloride, antimycin A and 5-azacytadine induce differential cytotoxicity in cell lines

The MTT assay measures the reductive capacity of the cell and is commonly used as a measure of cellular viability<sup>1</sup>. Cellular reductive capacity is primarily generated in active mitochondria, the greater the reduction of formazan salt, the greater the cellular viability. The IC<sub>50</sub> concentrations generated using the MTT assay were determined using non-linear least squares regression analysis (**Figure S4-S6**). Exposure of cells to cobalt chloride resulted in IC<sub>50</sub> concentrations of 173.7  $\mu$ M in PE/CAPJ41, 123.2  $\mu$ M in NOK-hTERT and 395.7  $\mu$ M in Liv-22K cells. The exposure of the cells to antimycin A resulted in IC<sub>50</sub> concentrations of 4.63  $\mu$ M in PE/CAPJ41, 5.70  $\mu$ M in NOK-hTERT and 5.52  $\mu$ M in Liv-22K cells. The exposure of the cells to 5-azacytadine resulted in IC<sub>50</sub> concentrations of 1.90  $\mu$ M in PE/CAPJ41, 1.86  $\mu$ M in NOK-hTERT and 2.22  $\mu$ M in Liv-22K cells.

## Supplementary Figures

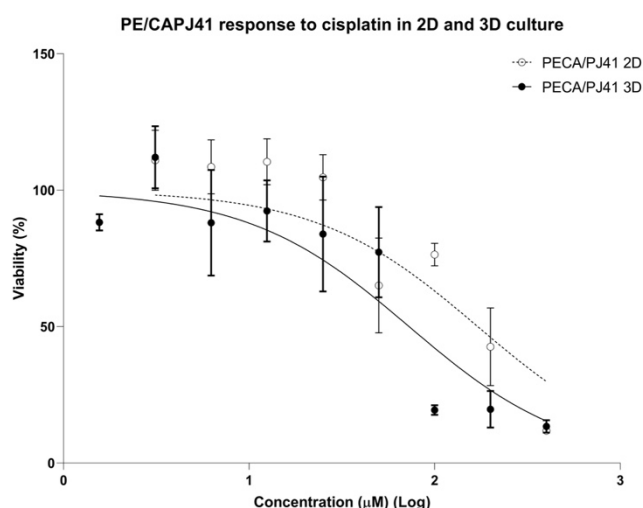

**Figure S1:** Concentration-response curve of PE/CAPJ41 in response to cisplatin treatment.

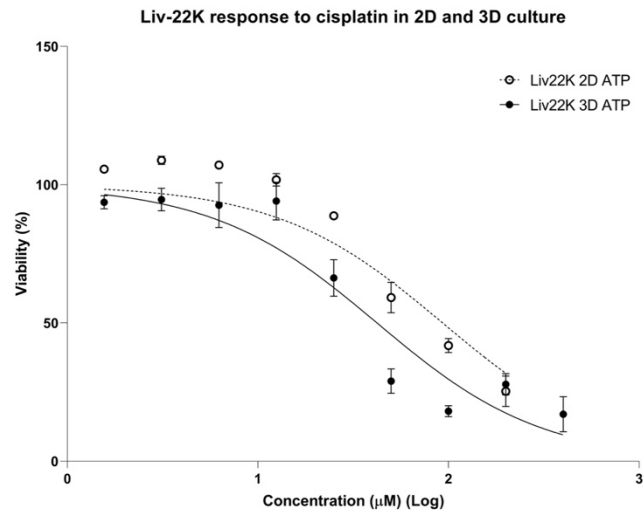

**Figure S2:** Concentration-response curve of Liv-22K in response to cisplatin treatment.

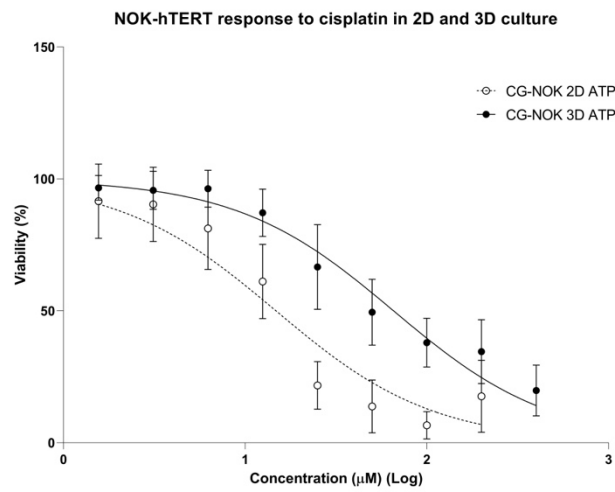

**Figure S3:** Concentration-response curve of NOK-hTERT in response to cisplatin treatment.

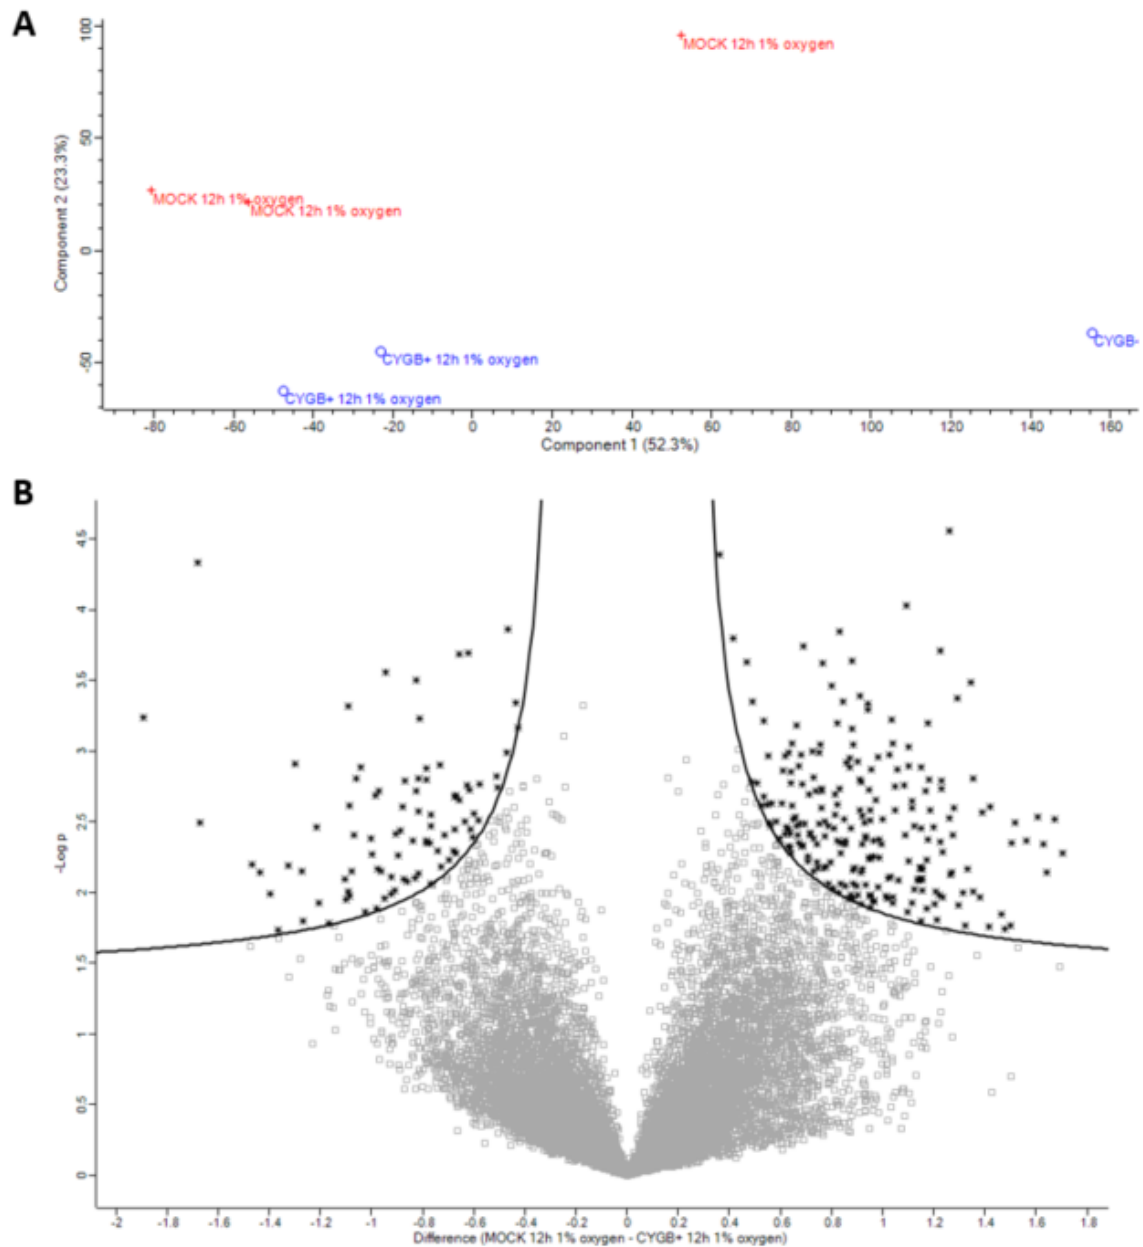

**Figure S4: A)** Principal component analysis of replicates of mock (un-transfected PE/CAPJ41 cells) vs CYGB (cytoglobin transfected PE/CAPJ41 cells) after 12 h cultured at 1 %  $O_2$  tension. **B)** Volcano plot represents the results of multiple  $t$ -tests with FDR correction of 0.05 applied. Stars on the right and left of significance line indicate statistically significantly differentially expressed genes (on right upregulated in CYGB expressing cells and on left upregulated in un-transfected cells) after 12 h growth in 1 %  $O_2$  tension.

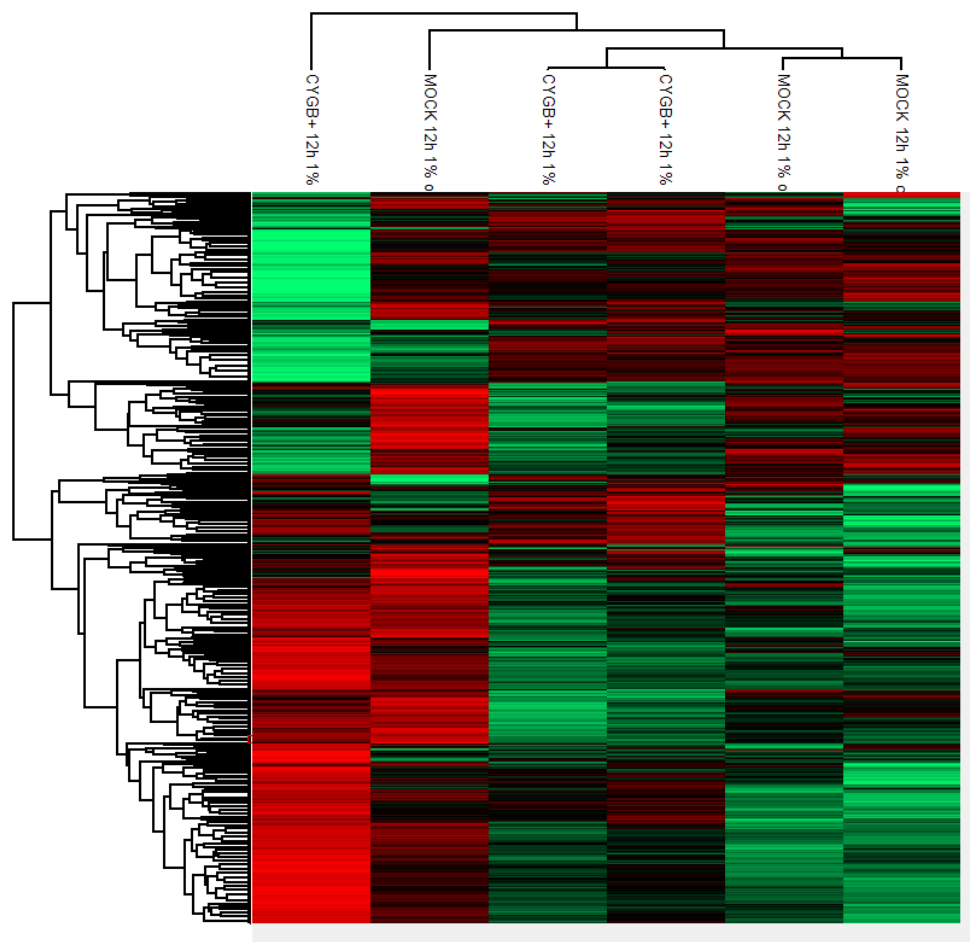

**Figure S5:** Heat map represents hierarchical clustering of un-transfected PE/CAPJ41 cells (MOCK) vs cytoglobin transfected PE/CAPJ41 cells (CYGB) after 12 h cultured at 1 % O<sub>2</sub> tension. Euclidian distancing represents clusters of commonly associated genes based on their differential expression.

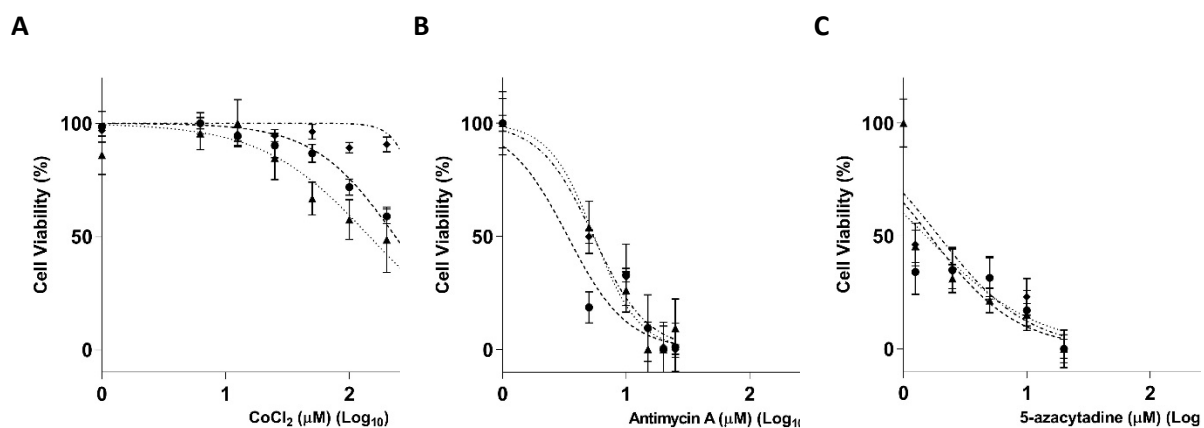

**Figure S6:** Dose-response curve of PE/CAPJ41, NOK-hTERT and Liv22K cells to cobalt chloride (**A**), antimycin A (**B**) and 5-azacytadine (**C**) over a 24 h period. Dose-response measured using the MTT assay and viability represented as a normalized absorbance of the control. Error bars represent standard error of the mean.

## Supplementary Tables

**Table S1A:** Description of genes used in study.

| Gene           | Function                                                                                                                   |
|----------------|----------------------------------------------------------------------------------------------------------------------------|
| <i>Actin</i>   | Actin. Assembly of microfilament                                                                                           |
| <i>B2M</i>     | $\beta_2$ microglobulin. Component of the class I Major Histocompatibility Complex                                         |
| <i>CYGB</i>    | Cytoglobin. A hexacoordinated heme containing globin                                                                       |
| <i>NQO1</i>    | NAD(P)H Quinone Dehydrogenase 1. Quinone reductase enzyme under control of NRF-2                                           |
| <i>NRF-2</i>   | Nuclear factor erythroid 2. Antioxidant regulator. Potentially under control of CYGB                                       |
| <i>HIF1A</i>   | Hypoxia inducing factor 1A. Associated with cellular response to hypoxia                                                   |
| <i>NFkB</i>    | Nuclear Factor kappa B. Early stage inflammatory response                                                                  |
| <i>GADD45A</i> | Growth arrest and DNA damage-inducible protein. Gene transcripts levels sensitive to growth arrest and DNA damaging agents |
| <i>Casp3</i>   | Caspase 3. Interacts with Caspase 8 and 9 and plays vital role in execution-phase of cell apoptosis                        |
| <i>GJB6</i>    | Gap junction beta-6-protein. Gap junction protein often expressed in spheroids cultures                                    |
| <i>MKI</i>     | KI-67. Used as marker of proliferation, commonly upregulated in spheroid culture                                           |
| <i>CDH1</i>    | E-cadherin. Calcium dependent cell-cell adhesion glycoprotein expressed on cell surface. Relevant in spheroid culture      |

**Table S1B:** List of genes and oligonucleotide sequences used in gene expression analysis. Shaded used as reference genes.

| Gene           | Oligonucleotides (5'-3')                              | Gene         | Oligonucleotides (5'-3')                               |
|----------------|-------------------------------------------------------|--------------|--------------------------------------------------------|
| <i>CYGB</i>    | ATCCTCATCCTCATCTTCATCCT (F)<br>CTGGGTCTGGTTACAAACATCA | <i>NFkB</i>  | CTTAGGAGGGAGAGCCAC (F)<br>CTTCTGCCATTCTGAAGCCG (R)     |
| <i>NQO1</i>    | GGACTGCACCAGAGCCAT (F)<br>TCCTTTCTTCTCAAAGCCG (R)     | <i>Casp3</i> | GCCTCTTCCCCATTCTCAT (F)<br>CTTCCATGTATGATCTTGGTTCC (R) |
| <i>HIF1A</i>   | GACAAGCCACCTGAGGAGAG (F)<br>ACGCGGAGAAGAGAAGGAAA      | <i>GJB6</i>  | CACGGGCATCCTGTGTTTTG (F)<br>TGCATGAAGAGGGCGTACAA (R)   |
| <i>GADD45A</i> | CACTGTCGGGGTGTACGAAG (F)<br>CCTGGATCAGGGTGAAGTGG (R)  | <i>MKI</i>   | TTACCGGGCGGAGGTATGAA (F)<br>GCTGGCTCCTGTTACGTAT (R)    |
|                |                                                       | <i>CDH1</i>  | GGGGTTAAGCACAACAGCAA (F)<br>CAAAATCCAAGCCCGTGGTG (R)   |
| <i>Actin</i>   | ACTCTTCCAGCCTTCCTTCC (F)<br>GTTGGCGTACAGGTCTTGC (R)   | <i>B2M</i>   | TTTGGCTCACAGTGTAAGGG (F)<br>GTCACCCCACTATGCCATT (R)    |

**Table S2:** List of statistically significant differentially expressed genes upregulated in *CYGB* expressing PE/CAPJ41 cells after 12 h incubation in 1 % O<sub>2</sub> tension in comparison to un-transfected (Mock) PE/CAPJ41 cells.

| Gene ID   | Gene name                                                                                 | "-LOG(P-value)" |
|-----------|-------------------------------------------------------------------------------------------|-----------------|
| TMBIM6    | transmembrane BAX inhibitor motif containing 6                                            | 3.630797        |
| SAMD4A    | sterile alpha motif domain containing 4A                                                  | 2.776229        |
| SULF2     | sulfatase 2                                                                               | 2.611485        |
| CALM3     | calmodulin 3 (phosphorylase kinase, delta)                                                | 3.216663        |
| ARHGAP5   | Rho GTPase activating protein 5                                                           | 2.624791        |
| MID1      | midline 1 (Opitz/BBB syndrome)                                                            | 2.965334        |
| DHRS4     | dehydrogenase/reductase (SDR family) member 4                                             | 2.499962        |
| DGKZ      | diacylglycerol kinase, zeta                                                               | 2.379752        |
| TMEM105   | transmembrane protein 105                                                                 | 2.633613        |
| PKP3      | plakophilin 3                                                                             | 2.411263        |
| HSD17B11  | hydroxysteroid (17-beta) dehydrogenase 11                                                 | 2.993964        |
| TOX4      | TOX high mobility group box family member 4                                               | 2.320592        |
| PSMB9     | proteasome (prosome, macropain) subunit, beta type, 9 (large multifunctional peptidase 2) | 2.411239        |
| LPIN3     | lipin 3                                                                                   | 2.852881        |
| BCAS4     | breast carcinoma amplified sequence 4                                                     | 2.772968        |
| RCAN3     | RCAN family member 3                                                                      | 2.518902        |
| BNIP3L    | BCL2/adenovirus E1B 19kDa interacting protein 3-like                                      | 2.894734        |
| MIS18BP1  | MIS18 binding protein 1                                                                   | 2.348443        |
| IRF7      | interferon regulatory factor 7                                                            | 2.694847        |
| RNF24     | ring finger protein 24                                                                    | 2.812161        |
| C21orf70  | chromosome 21 open reading frame 70                                                       | 2.379565        |
| NGDN      | neuroguidin, EIF4E binding protein                                                        | 2.21599         |
| CTHRC1    | collagen triple helix repeat containing 1                                                 | 2.731393        |
| SSH2      | slingshot homolog 2 (Drosophila)                                                          | 2.500654        |
| WEE1      | WEE1 homolog (S. pombe)                                                                   | 2.181654        |
| CPNE1     | copine I                                                                                  | 2.029758        |
| CD163L1   | CD163 molecule-like 1                                                                     | 2.691015        |
| C16orf48  | chromosome 16 open reading frame 48                                                       | 2.624383        |
| NEK11     | NIMA (never in mitosis gene a)- related kinase 11                                         | 3.843369        |
| ZNF395    | zinc finger protein 395                                                                   | 2.514658        |
| FLJ90757  | hypothetical LOC440465                                                                    | 1.954944        |
| HSPA13    | heat shock protein 70kDa family, member 13                                                | 2.953165        |
| FAM165B   | family with sequence similarity 165, member B                                             | 1.956582        |
| FOXL1     | forkhead box L1                                                                           | 2.157639        |
| LOC389831 | hypothetical LOC389831                                                                    | 2.926221        |
| CLCN4     | chloride channel 4                                                                        | 3.390881        |
| NRP1      | neuropilin 1                                                                              | 2.050944        |
| NDRG2     | NDRG family member 2                                                                      | 1.984551        |
| PARD6B    | par-6 partitioning defective 6 homolog beta (C. elegans)                                  | 1.893531        |
| SYTL1     | synaptotagmin-like 1                                                                      | 2.652832        |

|           |                                                         |          |
|-----------|---------------------------------------------------------|----------|
| FANCF     | Fanconi anemia, complementation group F                 | 2.242375 |
| LRRCC1    | leucine rich repeat and coiled-coil domain containing 1 | 2.346    |
| SNORD17   | small nucleolar RNA, C/D box 17                         | 4.033822 |
| LOC441869 | hypothetical protein LOC441869                          | 2.220962 |
| ACOT4     | acyl-CoA thioesterase 4                                 | 2.59909  |
| PTK6      | PTK6 protein tyrosine kinase 6                          | 2.082694 |
| MAMDC2    | MAM domain containing 2                                 | 2.175704 |
| TEP1      | telomerase-associated protein 1                         | 2.093223 |
| CFH       | complement factor H                                     | 2.717929 |
| TSPAN1    | tetraspanin 1                                           | 2.798061 |
| EPS8L2    | EPS8-like 2                                             | 2.579602 |
| LCTL      | lactase-like                                            | 2.526304 |
| ASB9      | ankyrin repeat and SOCS box containing 9                | 2.367036 |
| DIAPH2    | diaphanous homolog 2 (Drosophila)                       | 2.53151  |

\*-Log(*p*-value) represents *p*-value determined between un-transfected and *CYGB* transfected cells through *t*-test with 0.05 FDR correction.



**Table S3:** List of statistically significant differentially expressed genes downregulated in *CYGB* expressing PE/CAPJ41 cells after 12 h incubation in 1 % O<sub>2</sub> tension in comparison to un-transfected (Mock) PE/CAPJ41 cells. Data is expressed as fold-change induction in un-transfected cells

| Gene ID   | Gene name                                                              | "-LOG(P-value)" |
|-----------|------------------------------------------------------------------------|-----------------|
| HTRA1     | HtrA serine peptidase 1                                                | 3.23655         |
| MOXD1     | monooxygenase, DBH-like 1                                              | 2.495421        |
| SPP1      | secreted phosphoprotein 1                                              | 2.201717        |
| LOC728769 | hypothetical LOC728769                                                 | 2.141085        |
| ELL2      | elongation factor, RNA polymerase II, 2                                | 1.732045        |
| ADRBK2    | adrenergic, beta, receptor kinase 2                                    | 2.189362        |
| FSTL3     | follistatin-like 3 (secreted glycoprotein)                             | 2.152406        |
| BAIAP2L2  | BAI1-associated protein 2-like 2                                       | 1.798771        |
| REEP5     | receptor accessory protein 5                                           | 2.463585        |
| FAM25A    | family with sequence similarity 25, member A                           | 1.783071        |
| UIMC1     | ubiquitin interaction motif containing 1                               | 2.090902        |
| RPL28     | ribosomal protein L28                                                  | 1.952637        |
| TRIM37    | tripartite motif containing 37                                         | 2.007681        |
| MYO10     | myosin X                                                               | 1.970876        |
| SNHG9     | small nucleolar RNA host gene 9 (non-protein coding)                   | 2.611201        |
| CHAC1     | ChaC, cation transport regulator homolog 1 (E. coli)                   | 2.153926        |
| METRNL    | meteorin, glial cell differentiation regulator-like                    | 2.403716        |
| XRCC4     | X-ray repair complementing defective repair in Chinese hamster cells 4 | 2.802982        |
| YAF2      | YY1 associated factor 2                                                | 2.380972        |
| SQSTM1    | sequestosome 1                                                         | 2.272216        |
| SLMO1     | slowmo homolog 1 (Drosophila)                                          | 2.690173        |
| MLXIP     | MLX interacting protein                                                | 1.88925         |
| TCOF1     | Treacher Collins-Franceschetti syndrome 1                              | 2.164422        |
| HES5      | hairy and enhancer of split 5 (Drosophila)                             | 2.714889        |
| ASNS      | asparagine synthetase (glutamine-hydrolyzing)                          | 2.14765         |
| SEL1L3    | sel-1 suppressor of lin-12-like 3 (C. elegans)                         | 1.954379        |
| DPM3      | dolichyl-phosphate mannosyltransferase polypeptide 3                   | 2.111932        |
| PTPRM     | protein tyrosine phosphatase, receptor type, M                         | 1.986757        |
| CDC23     | cell division cycle 23 homolog (S. cerevisiae)                         | 2.017137        |
| SLC35E2   | solute carrier family 35, member E2                                    | 2.410292        |
| RALBP1    | ralA binding protein 1                                                 | 2.265475        |
| KIAA0114  | KIAA0114                                                               | 2.440977        |
| CAST      | calpastatin                                                            | 2.6029          |
| NADK      | NAD kinase                                                             | 2.090557        |
| CDC42EP1  | CDC42 effector protein (Rho GTPase binding) 1                          | 2.794323        |
| C1orf133  | chromosome 1 open reading frame 133                                    | 2.075355        |
| RDM1      | RAD52 motif 1                                                          | 2.103115        |
| PPP1R14C  | protein phosphatase 1, regulatory (inhibitor) subunit 14C              | 3.500974        |
| AOX1      | aldehyde oxidase 1                                                     | 2.574537        |
| ABCC3     | ATP-binding cassette, sub-family C (CFTR/MRP), member 3                | 2.130332        |

|              |                                                                  |          |
|--------------|------------------------------------------------------------------|----------|
| C17orf37     | chromosome 17 open reading frame 37                              | 3.228043 |
| C5orf45      | chromosome 5 open reading frame 45                               | 2.797773 |
| PPP4R1       | protein phosphatase 4, regulatory subunit 1                      | 2.353034 |
| RNU105A      | RNA, U105A small nucleolar                                       | 2.877051 |
| THOC3        | THO complex 3                                                    | 2.47027  |
| PTPRB        | protein tyrosine phosphatase, receptor type, B                   | 2.29411  |
| C9orf9       | chromosome 9 open reading frame 9                                | 2.901474 |
| HIGD2A       | HIG1 hypoxia inducible domain family, member 2A                  | 2.181702 |
| METTL12      | methyltransferase like 12                                        | 2.290182 |
| AP3B1        | adaptor-related protein complex 3, beta 1 subunit                | 2.444963 |
| TMEM222      | transmembrane protein 222                                        | 2.674985 |
| POC5         | POC5 centriolar protein homolog (Chlamydomonas)                  | 2.683338 |
| FUNDC2       | FUN14 domain containing 2                                        | 3.686194 |
| ZCCHC9       | zinc finger, CCHC domain containing 9                            | 2.653828 |
| CLPB         | ClpB caseinolytic peptidase B homolog (E. coli)                  | 2.498364 |
| UPP1         | uridine phosphorylase 1                                          | 2.762458 |
| FAM27A       | family with sequence similarity 27, member A                     | 3.694651 |
| C19orf24     | chromosome 19 open reading frame 24                              | 2.728574 |
| FTH1         | ferritin, heavy polypeptide 1                                    | 2.446903 |
| SAFB2        | scaffold attachment factor B2                                    | 2.393978 |
| LOC100268168 | hypothetical LOC100268168                                        | 2.560377 |
| TUBA4A       | tubulin, alpha 4a                                                | 2.510788 |
| CCDC124      | coiled-coil domain containing 124                                | 2.762999 |
| C7orf41      | chromosome 7 open reading frame 41                               | 2.739206 |
| TMED3        | transmembrane emp24 protein transport domain containing 3        | 2.98947  |
| PHF20L1      | PHD finger protein 20-like 1                                     | 3.866148 |
| FIS1         | fission 1 (mitochondrial outer membrane) homolog (S. cerevisiae) | 3.164292 |

\*-Log(*p*-value) represents *p*-value determined between un-transfected and *CYGB* transfected cells through *t*-test with 0.05 FDR correction.

## References

1. Mosmann, T. Rapid colorimetric assay for cellular growth and survival: Application to proliferation and cytotoxicity assays. *J. Immunol. Methods* **65**, 55–63 (1983).
