# Supplementary material for: Upregulation of Cytoglobin in 3D-cultures of Head and Neck Cancer Cells: Role of Hypoxia and Implications for Cisplatin Resistance
Source: Preprints.org preprint supplement (doi:10.20944/preprints202208.0043.v1), 2022-08-02
Supplement: Supplementary file 3 [file supplementary]

Archive with 2 entries (2 files):
- Rochordetal_SI.pdf
- __MACOSX/._Rochordetal_SI.pdf
